1 Title:

2 ***Object visibility, not energy expenditure, accounts for spatial biases in human***  
3 ***grasp selection***

4

5 Authors:

6 Guido Maiello<sup>a,\*†</sup>, Vivian C. Paulun<sup>a,†</sup>, Lina K. Klein<sup>a</sup>, Roland W. Fleming<sup>a</sup>

7 <sup>a</sup> Department of Experimental Psychology, Justus-Liebig University Giessen, Giessen 35394, Germany

8 \* Corresponding Author:

9 Guido Maiello

10 Department of Experimental Psychology, Justus-Liebig University Giessen, Otto-Behaghel-  
11 Str.10F, Giessen 35394, Germany

12 Email: [guido\\_maiello@yahoo.it](mailto:guido_maiello@yahoo.it)

13

14

15 <sup>†</sup> joint first authors; these authors contributed equally to this work

16

17 Author Contributions:

18 GM, VCP, LKK and RWF conceived and designed the study. VP collected the data. GM and VP  
19 analyzed the data. All authors wrote the manuscript.

20

## 21 **Abstract**

22 Humans exhibit spatial biases when grasping objects. These biases may be due to actors attempting to  
23 shorten their reaching movements and therefore minimize energy expenditures. An alternative  
24 explanation could be that they arise from actors attempting to minimize the portion of a grasped object  
25 occluded from view by the hand. We re-analyze data from a recent study, in which a key condition  
26 decouples these two competing hypotheses. The analysis reveals that object visibility, not energy  
27 expenditure, most likely accounts for spatial biases observed in human grasping.

## 28 **Keywords:**

29 Precision grip | Movement distance | Minimum energy | Object visibility | Perception/action |  
30 Reaching/grasping | Visuo-haptic interactions

## 31 **Main Text**

32 Human grasp selection is influenced by an array of factors, including the size, shape, mass, material,  
33 orientation, and position of the grasped object (e.g. see Cesari & Newell, 1999; Paulignan, Frak, Toni, &  
34 Jeannerod, 1997; Paulun, Gegenfurtner, Goodale, & Fleming, 2016; Schot, Brenner, & Smeets, 2010).  
35 Additionally, it has been proposed that humans may attempt to perform grasping movements  
36 economically, i.e., by minimizing the amount of work and resulting energy expenditure (Huang, Kram, &  
37 Ahmed, 2012). Minimizing energy expenditures could therefore explain spatial biases in grasping  
38 patterns, such as the biases toward shorter movement distances observed in several studies (Desanghere &  
39 Marotta, 2015; Glowania, van Dam, Brenner, & Plaisier, 2017; Kleinholdermann, Franz, & Gegenfurtner,  
40 2013). However, a study by Paulun, Kleinholdermann, Gegenfurtner, Smeets, & Brenner (2014)  
41 questions this hypothesis. Participants were asked to grasp objects while approaching them from different  
42 sides. Contrary to the expectation that participants should be biased toward shorter reaching movements  
43 regardless of the side of approach, the authors found that participants grasped the right side of the objects  
44 irrespective of where the movement started when grasping with the right hand. The authors concluded  
45 that participants simply preferred grasping objects on the side of the acting hand, and suggested that this  
46 behavior may help increase the visibility of the objects during grasping and subsequent manipulation  
47 (Bozzacchi, Brenner, Smeets, Volcic, & Domini, 2018).

48  
49 A more recent study by Paulun et al. (2016), which investigated how material properties and object  
50 orientation affect grasping, serendipitously contained two experimental conditions that can be used to  
51 contrast the object visibility hypothesis against the minimum reach hypothesis (Figure 1). Participants  
52 were asked to grasp, with a precision grip, small cylinders of Styrofoam, beech wood, brass and Vaseline-

53 covered brass presented at different orientations. In the 150-degree rotation condition (Figure 1a),  
54 grasping the object on its right side would result in shorter reach movements as well as increased object  
55 visibility, whereas grasping the object on its left side would result in longer reach movements as well as  
56 decreased object visibility: here the object visibility and minimum reach hypotheses make positively  
57 correlated predictions. The two hypotheses make inversely correlated predictions in the 60-degree  
58 rotation condition (Figure 1b). Here, grasping the object on its right side would result in longer reach  
59 movements but increased object visibility, whereas grasping the object on its left side would result in  
60 shorter reach movements but decreased object visibility.

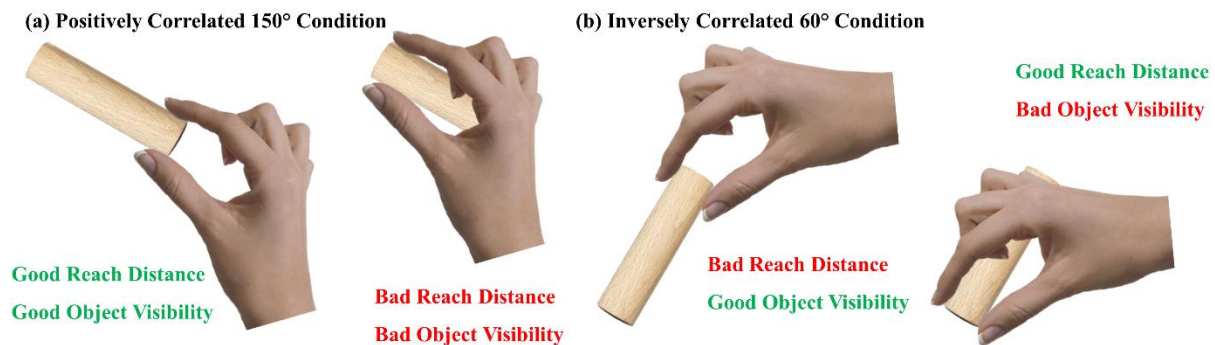

61

62 *Figure 1. Two conditions from Paulun et al. (2016) that contrast the object visibility and minimum reach hypotheses*  
63 *against each other.*

64 We therefore reanalyzed the data from these two conditions from Paulun et al. (2016) to distinguish  
65 whether participants exhibited grasping behavior consistent with the minimum reach or the object  
66 visibility hypotheses. We excluded from the analysis the 4% of grasps that fell along the long axis of the  
67 objects. First, we looked at the median grasping pattern in the 150-degree rotation condition and  
68 confirmed that the median grasp across participants was biased to the right side of the object (Figure 2a).  
69 Next, we used the bias in the 150-deg condition to make predictions regarding what the bias should be in  
70 the 60-deg condition under the two competing hypotheses. If participants were attempting to increase  
71 object visibility, they should exhibit a bias for grasps above the object midline (Figure 2b). If participants  
72 were attempting to minimize reach distance (and therefore energy expenditures), grasps should be biased  
73 for a region below the object midline (Figure 2b). Figure 2d shows how the median grasp across  
74 observers and conditions is indeed shifted above the object midline, contrary to the minimum reach  
75 hypothesis, and in near perfect alignment with the object visibility hypothesis.

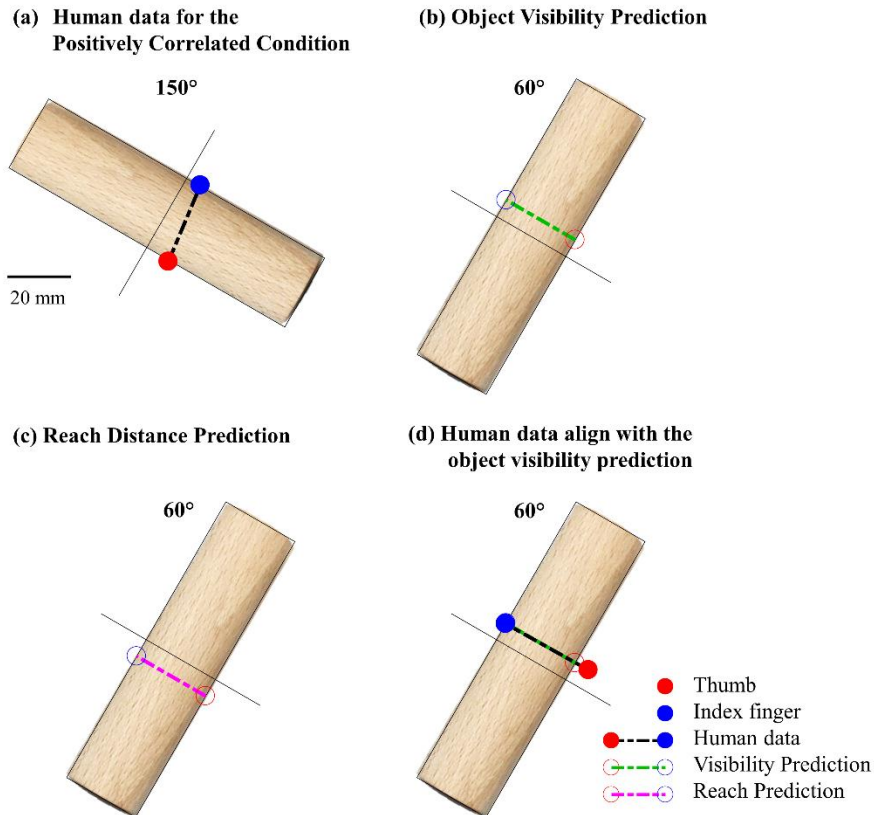

76

77 *Figure 2. Human grasps compared to the two competing hypotheses. Human data are the median grasp across*  
78 *participants.*

79 Energy minimization principles may still play a role in the planning and on-line control of arm and hand  
80 movements during grasping (e.g. Soechting, Buneo, Herrmann, & Flanders, 1995). However, our  
81 observation suggests that humans are not attempting to minimize energy expenditures when selecting  
82 where to grasp an object, at least not through minimizing reach distance. Instead, the observed spatial  
83 biases for which participants tend to grasp objects on the side of the acting hand are consistent with the  
84 hypothesis that humans are attempting to minimize the portions of the objects occluded by the hand.  
85 Therefore, object visibility, not energy expenditure, accounts for spatial biases in human grasp selection.

86 **Data availability.** Data and analysis scripts will be made available from the Zenodo database.

87 **Acknowledgments.** This research was supported by the DFG (IRTG-1901: 'The Brain in Action' and  
88 SFB-TRR-135: 'Cardinal Mechanisms of Perception'), and an ERC Consolidator Award (ERC-2015-  
89 CoG-682859: 'SHAPE'). Guido Maiello was supported by a Marie-Skłodowska-Curie Actions Individual  
90 Fellowship (H2020-MSCA-IF-2017: 'VisualGrasping' Project ID: 793660).

## 91 **References**

- 92 Bozzacchi, C., Brenner, E., Smeets, J. B., Volcic, R., & Domini, F. (2018). How removing visual  
93 information affects grasping movements. *Experimental Brain Research*, 236(4), 985–995.  
94 <https://doi.org/10.1007/s00221-018-5186-6>
- 95 Cesari, P., & Newell, K. M. (1999). The scaling of human grip configurations. *Journal of Experimental*  
96 *Psychology: Human Perception and Performance*, 25(4), 927–935. [https://doi.org/10.1037/0096-](https://doi.org/10.1037/0096-1523.25.4.927)  
97 [1523.25.4.927](https://doi.org/10.1037/0096-1523.25.4.927)
- 98 Desanghere, L., & Marotta, J. J. (2015). The influence of object shape and center of mass on grasp and  
99 gaze. *Frontiers in Psychology*, 6. <https://doi.org/10.3389/fpsyg.2015.01537>
- 100 Glowania, C., van Dam, L. C. J., Brenner, E., & Plaisier, M. A. (2017). Smooth at one end and rough at  
101 the other: influence of object texture on grasping behaviour. *Experimental Brain Research*, 235(9), 2821–  
102 2827. <https://doi.org/10.1007/s00221-017-5016-2>
- 103 Huang, H. J., Kram, R., & Ahmed, A. A. (2012). Reduction of Metabolic Cost during Motor Learning of  
104 Arm Reaching Dynamics. *Journal of Neuroscience*, 32(6), 2182–2190.  
105 <https://doi.org/10.1523/JNEUROSCI.4003-11.2012>
- 106 Kleinholdermann, U., Franz, V. H., & Gegenfurtner, K. R. (2013). Human grasp point selection. *Journal*  
107 *of Vision*, 13(8), 23–23. <https://doi.org/10.1167/13.8.23>
- 108 Paulignan, Y., Frak, V. G., Toni, I., & Jeannerod, M. (1997). Influence of object position and size on  
109 human prehension movements: *Experimental Brain Research*, 114(2), 226–234.  
110 <https://doi.org/10.1007/PL00005631>
- 111 Paulun, V. C., Gegenfurtner, K. R., Goodale, M. A., & Fleming, R. W. (2016). Effects of material  
112 properties and object orientation on precision grip kinematics. *Experimental Brain Research*, 234(8),  
113 2253–2265. <https://doi.org/10.1007/s00221-016-4631-7>
- 114 Paulun, V. C., Kleinholdermann, U., Gegenfurtner, K. R., Smeets, J. B. J., & Brenner, E. (2014). Center  
115 or side: biases in selecting grasp points on small bars. *Experimental Brain Research*, 232(7), 2061–2072.  
116 <https://doi.org/10.1007/s00221-014-3895-z>
- 117 Schot, W. D., Brenner, E., & Smeets, J. B. J. (2010). Posture of the arm when grasping spheres to place  
118 them elsewhere. *Experimental Brain Research*, 204(2), 163–171. [https://doi.org/10.1007/s00221-010-](https://doi.org/10.1007/s00221-010-2261-z)  
119 [2261-z](https://doi.org/10.1007/s00221-010-2261-z)
- 120 Soechting, J., Buneo, C., Herrmann, U., & Flanders, M. (1995). Moving effortlessly in three dimensions:  
121 does Donders' law apply to arm movement? *The Journal of Neuroscience*, 15(9), 6271–6280.  
122 <https://doi.org/10.1523/JNEUROSCI.15-09-06271.1995>
